# Supplementary material for: Exploring a silicene monolayer as a promising sensor platform to detect and capture NO and CO gas
Source: Royal Society of Chemistry journal article supplement (doi:10.1039/d2ra00442a), 2022-01-01
Supplement: d2ra00442a1.pdf [file d2ra00442a1.pdf]

## Exploring silicene monolayer as promising sensor platform to detect and capture NO and CO gas

Duy Khanh Nguyen,<sup>1</sup> Duc-Quang Hoang,<sup>2</sup> and D. M. Hoat<sup>3,4,\*</sup>

<sup>1</sup>Group of Computational Physics and Simulation of Advanced Materials, Institute of Applied Technology, Thu Dau Mot University, Binh Duong Province, Vietnam

<sup>2</sup>Applied Computational Civil and Structural Engineering Research Group, Faculty of Civil Engineering, Ton Duc Thang University, Ho Chi Minh City, Viet Nam

<sup>3</sup>Computational Laboratory for Advanced Materials and Structures, Advanced Institute of Materials Science, Ton Duc Thang University, Ho Chi Minh City, Viet Nam

<sup>4</sup>Faculty of Applied Sciences, Ton Duc Thang University, Ho Chi Minh City, Viet Nam

\*Corresponding author: [dominhhoat@tdtu.edu.vn](mailto:dominhhoat@tdtu.edu.vn)

Table S1: Adsorption energy (eV/molecule) of XO (X = N and C) molecules onto pristine and Al-doped silicene monolayer calculated with LDA functional.

|    | XO                     | 2XO1  | 2XO2  | 2XO3  | 2XO4  | 3XO   | 4XO   |
|----|------------------------|-------|-------|-------|-------|-------|-------|
|    | Onto pristine silicene |       |       |       |       |       |       |
| NO | -0.89                  | -2.00 | -0.89 | -0.79 | -0.86 | -0.93 | -0.90 |
| CO | -0.22                  | -0.81 | -0.28 | -0.13 | -0.27 | -0.28 | -0.29 |
|    | Onto Al-doped silicene |       |       |       |       |       |       |
| CO | -0.78                  | -1.13 | -0.79 | -0.82 | -0.78 | -0.82 | -0.82 |

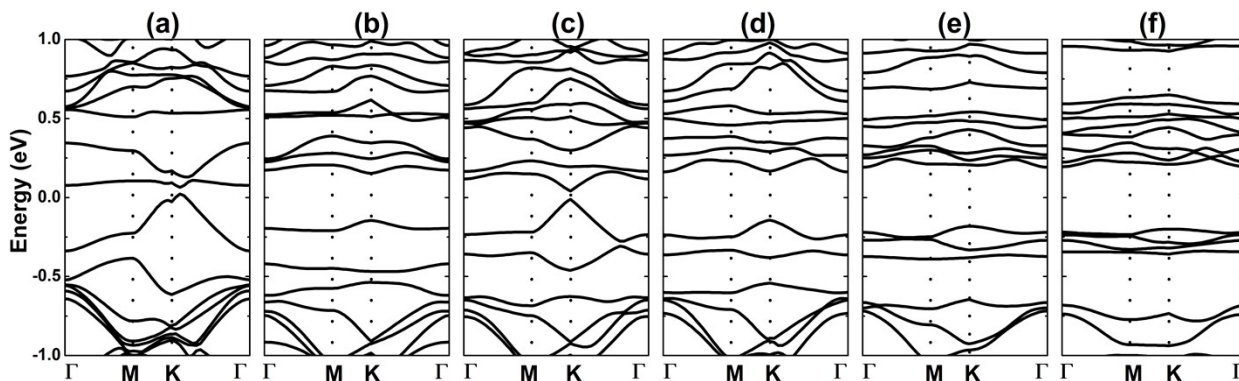

Figure S1. Electronic band structure (a) 2CO1-, (b) 2CO2-, (c) 2CO3-, (d) 2CO4-, (e) 3CO- and (f) 4CO-adsorbed silicene monolayer.

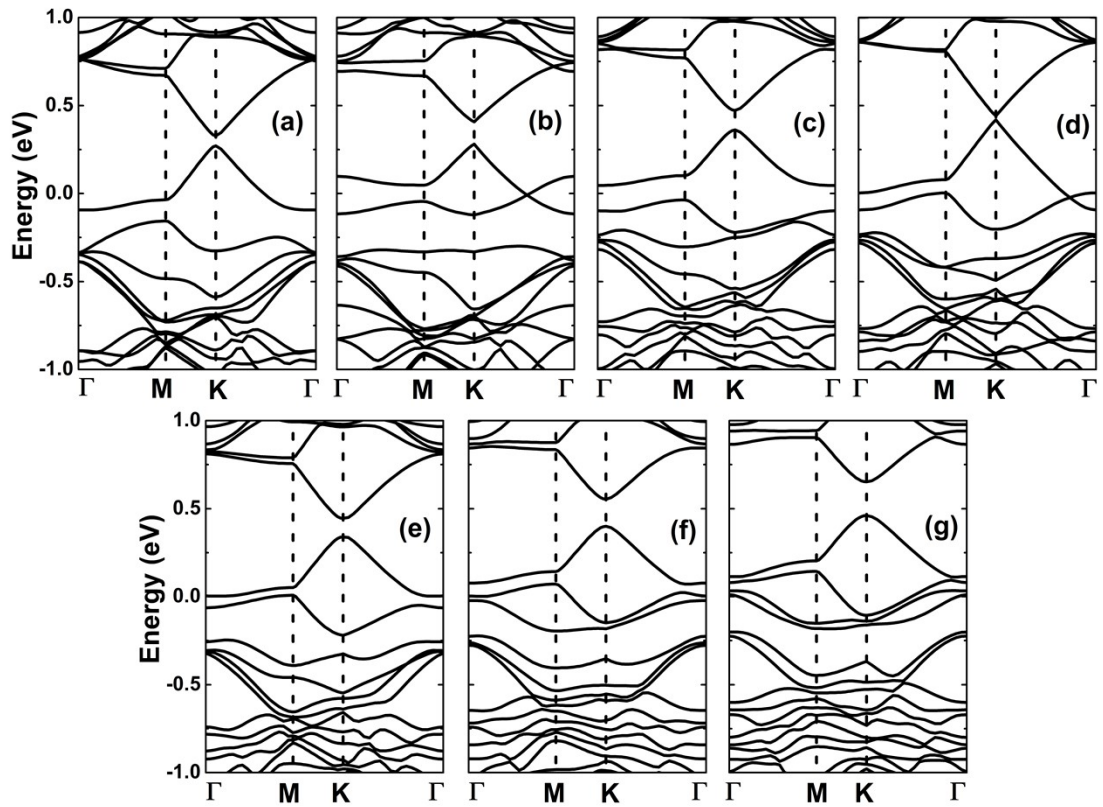

Figure S2: Band structure of (a) Al-, (b) 2Al1-, (c) 2Al2-, (d) 2Al3-, (e) 2Al4-, (f) 3Al-, and (g) 4Al-doped silicene monolayer.
